# Supplementary material
Source: MDPI journal article supplement (https://www.mdpi.com/2073-4441/14/13/2003)
Supplement: s1 [file s1]

## Supplemental Figures

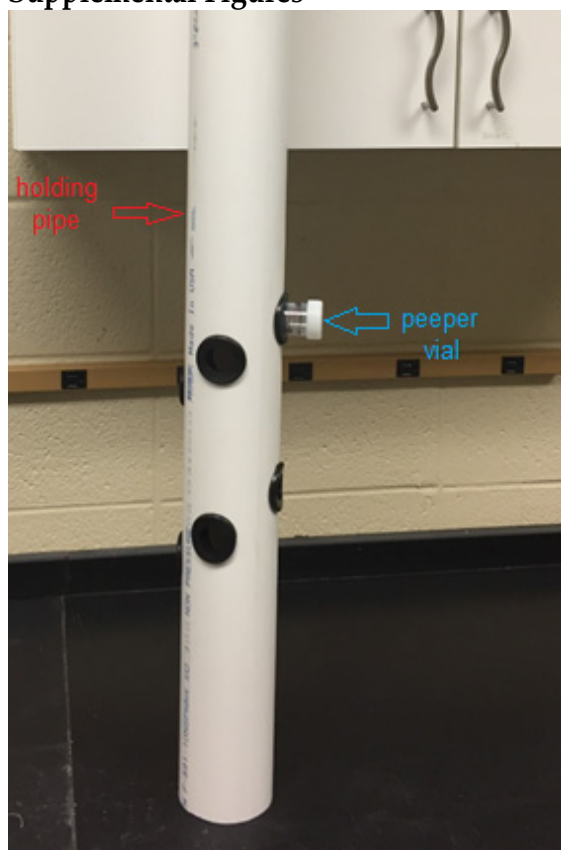

(a)

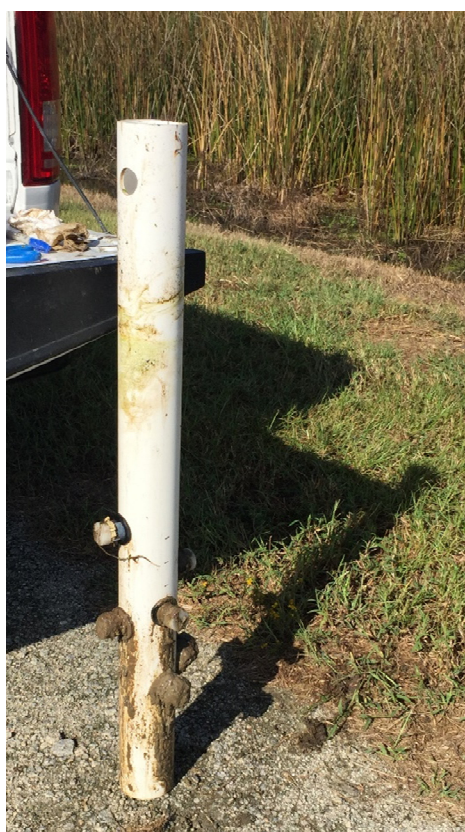

(b)

Figure S1. Photos of a peeper device. (a) shows a peeper device before the deployment, and (b) shows a peeper device after the retrieval.

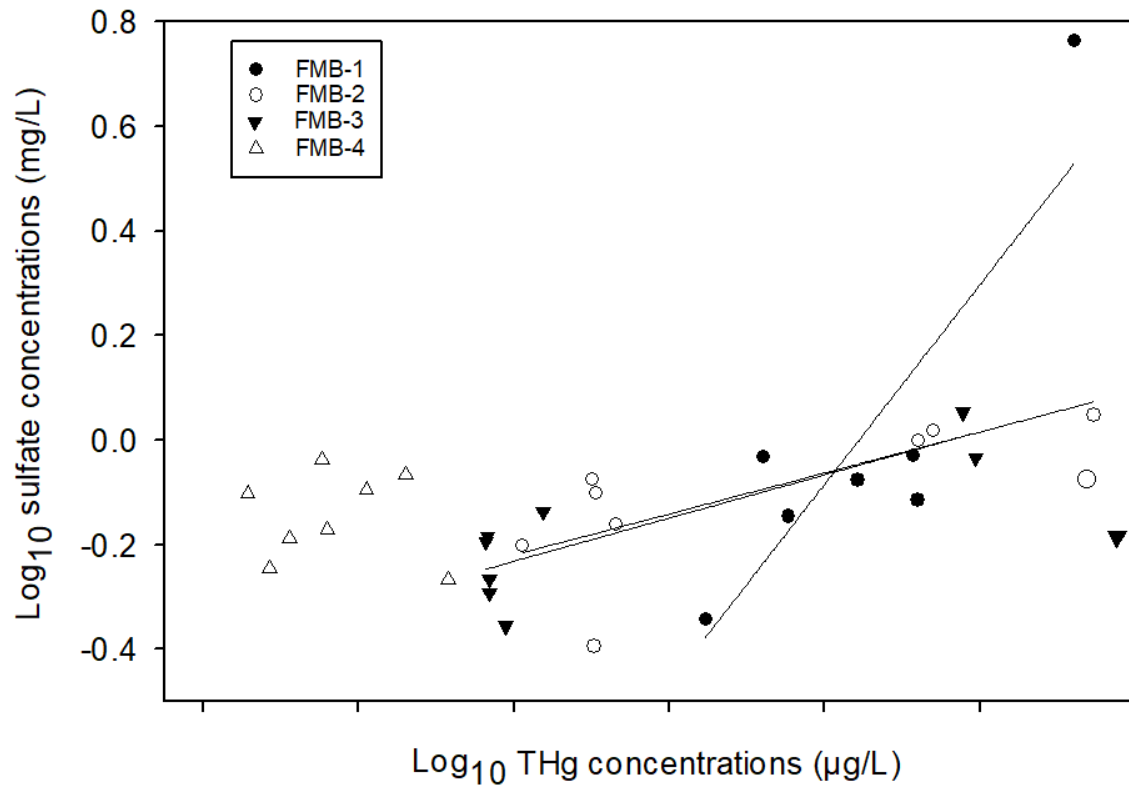

Figure S2. Relationships between porewater total mercury (THg) concentrations and sulfate in site FMB-1, -2, -3, and -4. Regression between THg and sulfate (a): FMB-1,  $p = 0.01$ , adjusted  $r^2 = 0.73$ ,  $n = 7$ ; FMB-2,  $p = 0.03$ , adjusted  $r^2 = 0.48$ ,  $n = 8$ ; FMB-3,  $p = 0.007$ , adjusted  $r^2 = 0.69$ ,  $n = 8$ ; FMB-4,  $p > 0.05$ ,  $n = 8$ .

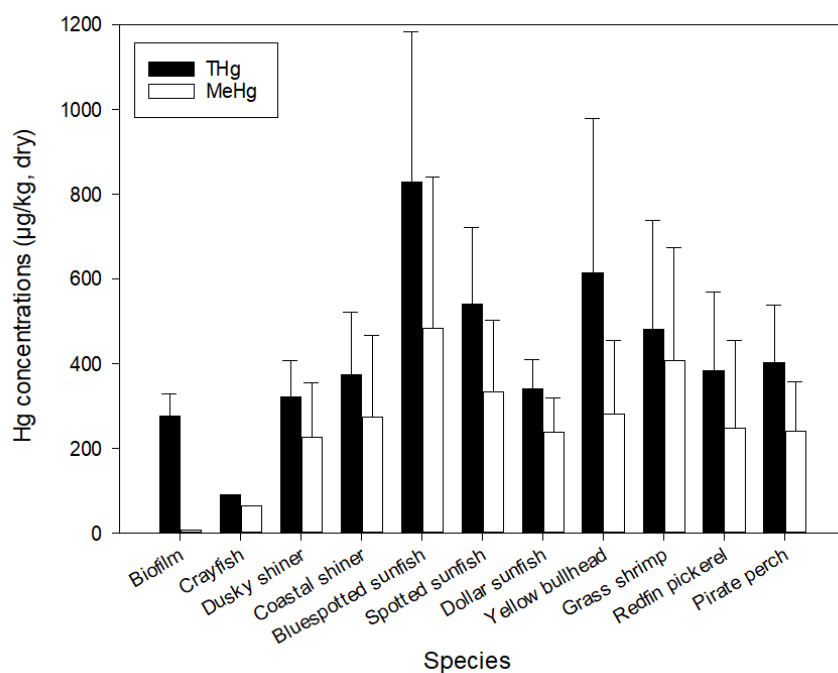

(a)

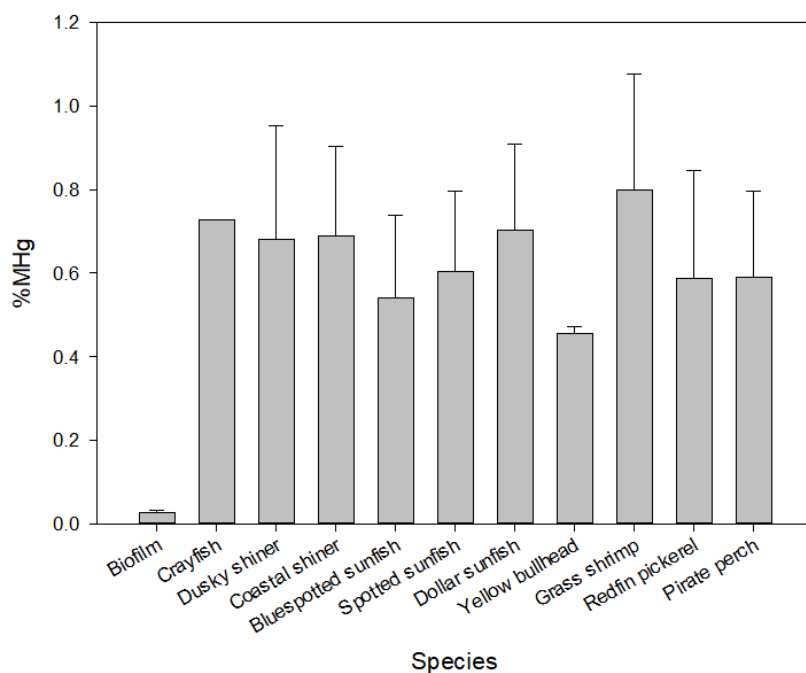

(b)

Figure S3. (a) Mercury (total and methyl-) concentrations and (b) percentage of methylmercury in total mercury (%MHg) in biota. Columns and error bars indicate means and standard deviations.

## Supplemental Tables

Table S1. Definitions of mercury (Hg) species in this study.

| Definition | Full name                                                                                                               | Samples                       | Method                                                         |
|------------|-------------------------------------------------------------------------------------------------------------------------|-------------------------------|----------------------------------------------------------------|
| THg        | Total Hg                                                                                                                | Porewater,<br>sediment, biota | Measured with Direct Mercury<br>Analyzer-80                    |
| MHg        | Monomethyl-Hg                                                                                                           | Sediment, biota               | Measured with MERX Automated<br>Methylmercury System           |
| IHg        | Hg <sup>2+</sup> , HgOH <sup>+</sup> ,<br>Hg(OH) <sub>2</sub> , Hg(OH) <sub>3</sub> <sup>-</sup> ,<br>HgSO <sub>4</sub> | Water at SWI                  | Predicted by WHAM                                              |
| IHg-DOC    | DOC and IHg<br>complex                                                                                                  | Water at SWI                  | Predicted by WHAM                                              |
| MHg salts  | CH <sub>3</sub> HgOH <sup>+</sup> ,<br>CH <sub>3</sub> HgOH, CH <sub>3</sub> HgCL                                       | Water at SWI                  | Predicted by WHAM                                              |
| MHg-DOC    | DOC and MHg<br>complex                                                                                                  | Water at SWI                  | Predicted by WHAM                                              |
| NLHg       | Non-labile Hg                                                                                                           | Water at SWI                  | [NLHg] = [THg] – [IHg] – [MHg<br>salts] – [IHg-DOC]– [MHg-DOC] |

SWI: sediment-water interface.

WHAM: Windermere Humic Aqueous Model.

Table S2. Depth profile of concentrations of total mercury (THg), methylmercury (MHg), and percentage of MHg in THg (%MHg) in the bulk sediment. The depth of 0 cm indicates the sediment-water interface (SWI).

| Site  | Depth<br>(cm) | THg<br>( $\mu\text{g/kg}$ ) | MHg<br>( $\mu\text{g/kg}$ ) | %MHg<br>(%) |
|-------|---------------|-----------------------------|-----------------------------|-------------|
| FBM-1 | 4(floc)       | 534.3                       | 15.9                        | 3.0%        |
|       | 0(SWI)        | 335.8                       | 10.3                        | 3.1%        |
|       | -4            | 331.1                       | 9.26                        | 2.8%        |
|       | -8            | 301.2                       | 8.51                        | 2.8%        |
|       | -12           | 278.9                       | 7.92                        | 2.8%        |
|       | -16           | 262.4                       | 5.44                        | 2.1%        |
|       | -20           | 279.0                       | 4.41                        | 1.6%        |
|       | -24           | 270.7                       | 4.58                        | 1.7%        |
| FBM-2 | 4(floc)       | 292.7                       | 5.18                        | 1.8%        |
|       | 0(SWI)        | 182.0                       | 3.24                        | 1.8%        |
|       | -4            | 174.0                       | 2.97                        | 1.7%        |
|       | -8            | 116.9                       | 1.86                        | 1.6%        |
|       | -12           | 106.5                       | 1.84                        | 1.7%        |
|       | -16           | 101.0                       | 0.97                        | 1.0%        |
|       | -20           | 66.0                        | 0.88                        | 1.3%        |
|       | -24           | 53.8                        | 0.80                        | 1.5%        |
| FBM-3 | 4(floc)       | 241.9                       | 4.89                        | 2.0%        |
|       | 0(SWI)        | 233.1                       | 4.69                        | 2.0%        |
|       | -4            | 190.7                       | 3.18                        | 1.7%        |
|       | -8            | 117.0                       | 1.90                        | 1.6%        |
|       | -12           | 106.9                       | 1.73                        | 1.6%        |
|       | -16           | 106.6                       | 1.75                        | 1.6%        |
|       | -20           | 107.2                       | 1.74                        | 1.6%        |
|       | -24           | 60.0                        | 1.06                        | 1.8%        |
| FBM-4 | 4(floc)       | 232.6                       | 2.73                        | 1.2%        |
|       | 0(SWI)        | 205.0                       | 2.51                        | 1.2%        |
|       | -4            | 192.8                       | 2.41                        | 1.2%        |
|       | -8            | 162.7                       | 1.83                        | 1.1%        |
|       | -12           | 155.3                       | 1.82                        | 1.2%        |
|       | -16           | 160.2                       | 1.61                        | 1.0%        |
|       | -20           | 158.5                       | 1.41                        | 0.9%        |
|       | -24           | 157.0                       | 1.53                        | 1.0%        |

Table S3. Depth profile of total mercury (THg), dissolved organic carbon (DOC), chloride, and sulfate in sediment porewaters. The depth of 0 cm indicates the sediment-water interface (SWI).

| Site  | Depth<br>(cm) | THg<br>( $\mu\text{g/L}$ ) | DOC<br>( $\text{mg/L}$ ) | Chloride<br>( $\text{mg/L}$ ) | Sulfate<br>( $\text{mg/L}$ ) |
|-------|---------------|----------------------------|--------------------------|-------------------------------|------------------------------|
| FBM-1 | 4             | 1.32                       | 5.97                     | 8.65                          | 5.81                         |
|       | 0(SWI)        | 0.83                       | 5.17                     | 14.0                          | 0.77                         |
|       | -4            | 0.82                       | 4.97                     | 11.9                          | 0.93                         |
|       | -8            | 0.70                       | 4.67                     | 7.63                          | 0.84                         |
|       | -12           | 0.57                       | 3.77                     | 15.0                          | 0.72                         |
|       | -16           | 0.53                       | 4.79                     | 12.8                          | 0.93                         |
|       | -20           | 0.44                       | 3.74                     | 7.06                          | 0.45                         |
| FBM-2 | 4             | 1.40                       | 4.53                     | 2.44                          | 1.12                         |
|       | 0(SWI)        | 0.87                       | 4.72                     | 2.29                          | 1.04                         |
|       | -4            | 0.83                       | 3.83                     | 2.20                          | 1.00                         |
|       | -8            | 0.73                       | 2.89                     | 3.15                          | 0.79                         |
|       | -12           | 0.32                       | 2.11                     | 3.92                          | 0.40                         |
|       | -16           | 0.34                       | 1.93                     | 2.77                          | 0.69                         |
|       | -20           | 0.32                       | 1.38                     | 3.97                          | 0.84                         |
| FBM-3 | -24           | 0.26                       | 1.96                     | 3.12                          | 0.63                         |
|       | 4             | 0.95                       | 4.71                     | 2.67                          | 1.13                         |
|       | 0(SWI)        | 0.99                       | 5.10                     | 1.46                          | 0.92                         |
|       | -4            | 0.73                       | 5.53                     | 1.23                          | 0.73                         |
|       | -8            | 0.53                       | 1.50                     | 0.61                          | 0.65                         |
|       | -12           | 0.23                       | 1.67                     | 0.71                          | 0.64                         |
|       | -16           | 0.23                       | 3.05                     | 1.63                          | 0.54                         |
| FBM-4 | -20           | 0.25                       | 1.76                     | 1.23                          | 0.44                         |
|       | -24           | 0.23                       | 2.02                     | 2.23                          | 0.51                         |
|       | 4             | 0.21                       | 6.14                     | 1.75                          | 0.54                         |
|       | 0(SWI)        | 0.18                       | 6.87                     | 2.89                          | 0.86                         |
|       | -4            | 0.16                       | 7.04                     | 2.34                          | 0.80                         |
|       | -8            | 0.14                       | 4.15                     | 2.51                          | 0.67                         |
|       | -12           | 0.13                       | 4.09                     | 2.93                          | 0.65                         |
| FBM-4 | -16           | 0.14                       | 4.13                     | 2.75                          | 0.92                         |
|       | -20           | 0.11                       | 4.19                     | 7.84                          | 0.79                         |
|       | -24           | 0.12                       | 4.36                     | 11.2                          | 0.57                         |

Table S4. The output of the multiple linear regression that explores relationships between total mercury in porewater and dissolved organic carbon (DOC), sulfate, and chloride.

|                                       | Coefficient | Std. error | P     | VIF  |
|---------------------------------------|-------------|------------|-------|------|
| Constant                              | -0.37       | 0.12       | 0.047 |      |
| Log <sub>10</sub> <sup>DOC</sup>      | -0.08       | 0.28       | 0.77  | 1.23 |
| Log <sub>10</sub> <sup>Chloride</sup> | 0.121       | 0.15       | 0.42  | 1.13 |
| Log <sub>10</sub> <sup>Sulfate</sup>  | 0.87        | 0.28       | 0.005 | 1.18 |

Table S5. Total mercury (THg), methylmercury (MHg), percentage of MHg in THg (%MHg), and stable carbon ( $\delta^{15}\text{N}$ ) and nitrogen ( $\delta^{13}\text{C}$ ) isotopes in biotic samples.

| Species             | Dry weight                  |                             | Wet weight                  |                             | %MHg | $\delta^{15}\text{N}$<br>(‰) | $\delta^{13}\text{C}$<br>(‰) |
|---------------------|-----------------------------|-----------------------------|-----------------------------|-----------------------------|------|------------------------------|------------------------------|
|                     | THg<br>( $\mu\text{g/kg}$ ) | MHg<br>( $\mu\text{g/kg}$ ) | THg<br>( $\mu\text{g/kg}$ ) | MHg<br>( $\mu\text{g/kg}$ ) |      |                              |                              |
| Biofilm             | 286.00                      | 7.92                        |                             |                             | 0.03 | 8.54                         | -29.52                       |
| Biofilm             | 298.00                      | 8.94                        |                             |                             | 0.03 | 7.99                         | -29.05                       |
| Biofilm             | 241.00                      | 7.98                        |                             |                             | 0.03 | 9.84                         | -29.91                       |
| Biofilm             | 274.00                      | 7.92                        |                             |                             | 0.03 | 8.37                         | -28.93                       |
| Biofilm             | 326.00                      | 8.23                        |                             |                             | 0.03 | 7.09                         | -29.10                       |
| Biofilm             | 396.00                      | 9.45                        |                             |                             | 0.02 | /                            | /                            |
| Biofilm             | 304.00                      | 8.15                        |                             |                             | 0.03 | 7.49                         | -28.81                       |
| Biofilm             | 367.00                      | 8.98                        |                             |                             | 0.02 | 7.69                         | -29.24                       |
| Biofilm             | 277.00                      | 6.51                        |                             |                             | 0.02 | 6.91                         | -28.83                       |
| Biofilm             | 246.00                      | 6.76                        |                             |                             | 0.03 | 7.24                         | -28.92                       |
| Biofilm             | 241.00                      | 7.84                        |                             |                             | 0.03 | 7.36                         | -28.86                       |
| Biofilm             | 218.00                      | 7.14                        |                             |                             | 0.03 | 6.47                         | -28.18                       |
| Biofilm             | 257.00                      | 8.38                        |                             |                             | 0.03 | 10.31                        | -28.59                       |
| Biofilm             | 216.00                      | 7.11                        |                             |                             | 0.03 | 8.39                         | -28.12                       |
| Biofilm             | 236.00                      | 7.02                        |                             |                             | 0.03 | 8.27                         | -28.10                       |
| Biofilm             | 253.00                      | 7.20                        |                             |                             | 0.03 | 7.38                         | -27.96                       |
| Bluespotted sunfish | 579.00                      | 232.12                      | 169.52                      | 67.96                       | 0.40 | 16.83                        | -31.08                       |
| Bluespotted sunfish | 1080.00                     | 736.23                      | 287.86                      | 196.23                      | 0.68 | 11.30                        | -33.42                       |
| Coastal shiner      | 339.00                      | 161.00                      | 102.02                      | 48.45                       | 0.47 | 11.93                        | -29.47                       |
| Coastal shiner      | 282.00                      | 254.73                      | 84.87                       | 76.66                       | 0.90 | 13.80                        | -28.33                       |
| Crayfish            | 90.00                       | 65.40                       | 28.63                       | 20.80                       | 0.73 | 13.02                        | -28.25                       |
| Coastal shiner      | 411.00                      | 344.18                      | 117.10                      | 98.07                       | 0.84 | 15.25                        | -34.30                       |
| Coastal shiner      | 685.00                      | 677.99                      | 178.75                      | 176.92                      | 0.99 | 10.01                        | -28.62                       |
| Coastal shiner      | 273.00                      | 132.86                      | 57.23                       | 27.85                       | 0.49 | 12.64                        | -32.46                       |
| Coastal shiner      | 367.00                      | 206.26                      | 79.97                       | 44.94                       | 0.56 | 8.59                         | -31.35                       |
| Coastal shiner      | 261.00                      | 151.22                      | 64.27                       | 37.24                       | 0.58 | 16.16                        | -28.02                       |
| Dollar sunfish      | 350.00                      | 143.50                      | 93.16                       | 38.20                       | 0.41 | 14.80                        | -31.83                       |
| Dollar sunfish      | 311.00                      | 181.18                      | 84.45                       | 49.20                       | 0.58 | 14.64                        | -31.09                       |
| Dollar sunfish      | 446.00                      | 327.00                      | 131.29                      | 96.26                       | 0.73 | 15.21                        | -29.19                       |
| Dollar sunfish      | 249.00                      | 173.63                      | 63.51                       | 44.29                       | 0.70 | 15.40                        | -31.77                       |
| Dollar sunfish      | 382.00                      | 290.04                      | 85.58                       | 64.98                       | 0.76 | /                            | /                            |
| Dollar sunfish      | 307.00                      | 316.29                      | 82.27                       | 84.76                       | 1.03 | 15.32                        | -34.34                       |
| Dusky shiner        | 379.00                      | 423.69                      | 97.67                       | 109.19                      | 1.12 | 11.12                        | -29.20                       |
| Dusky shiner        | 357.00                      | 197.16                      | 83.88                       | 46.32                       | 0.55 | 12.81                        | -28.33                       |
| Dusky shiner        | 439.00                      | 480.15                      | 110.44                      | 120.79                      | 1.09 | 9.20                         | -31.76                       |
| Dusky shiner        | 476.00                      | 317.26                      | 109.86                      | 73.22                       | 0.67 | 10.14                        | -31.00                       |
| Dusky shiner        | 348.00                      | 224.11                      | 100.57                      | 64.77                       | 0.64 | 12.96                        | -28.29                       |



|                 |         |        |        |        |      |       |        |
|-----------------|---------|--------|--------|--------|------|-------|--------|
| Dusky shiner    | 242.00  | 264.76 | 64.30  | 70.35  | 1.09 | 12.54 | -27.63 |
| Dusky shiner    | 266.00  | 83.28  | 74.09  | 23.20  | 0.31 | 10.01 | -27.77 |
| Dusky shiner    | 301.00  | 152.59 | 74.97  | 38.00  | 0.51 | 13.23 | -29.12 |
| Dusky shiner    | 243.00  | 144.90 | 65.57  | 39.10  | 0.60 | 13.74 | -29.32 |
| Dusky shiner    | 183.00  | 79.08  | 54.55  | 23.57  | 0.43 | 13.63 | -29.13 |
| Dusky shiner    | 283.00  | 141.31 | 79.85  | 39.87  | 0.50 | 12.68 | -30.52 |
| Dusky shiner    | 352.00  | 226.99 | 89.19  | 57.52  | 0.64 | 12.10 | -28.93 |
| Grass shrimp    | 686.00  | 523.61 | 164.54 | 125.59 | 0.76 | 15.70 | -30.27 |
| Grass shrimp    | 227.00  | 51.31  | 62.83  | 14.20  | 0.23 | 15.84 | -32.25 |
| Grass shrimp    | 411.00  | 468.25 | 104.27 | 118.80 | 1.14 | /     | /      |
| Grass shrimp    | 845.00  | 741.70 | 199.08 | 174.74 | 0.88 | 16.86 | -29.19 |
| Grass shrimp    | 792.00  | 778.00 | 195.99 | 192.52 | 0.98 | 17.00 | -29.99 |
| Grass shrimp    | 193.00  | 175.50 | 54.39  | 49.46  | 0.91 | 15.04 | -30.57 |
| Grass shrimp    | 353.00  | 312.71 | 92.25  | 81.72  | 0.89 | 15.93 | -29.56 |
| Grass shrimp    | 347.00  | 209.55 | 92.20  | 55.68  | 0.60 | 16.50 | -29.58 |
| Grass shrimp    | 222.00  | /      | 52.48  | /      | /    | 15.73 | -29.52 |
| Pirate perch    | 261.00  | 100.95 | 62.02  | 23.99  | 0.39 | 13.46 | -30.89 |
| Pirate perch    | 409.00  | 205.72 | 96.90  | 48.74  | 0.50 | 24.22 | -35.25 |
| Pirate perch    | 687.00  | 450.09 | 162.84 | 106.69 | 0.66 | 16.02 | -34.21 |
| Pirate perch    | 250.00  | 133.48 | 61.26  | 32.71  | 0.53 | 17.35 | -31.27 |
| Pirate perch    | 348.00  | 136.31 | 96.09  | 37.64  | 0.39 | 16.38 | -33.20 |
| Pirate perch    | 531.00  | 224.65 | 132.03 | 55.86  | 0.42 | 16.69 | -34.72 |
| Pirate perch    | 370.00  | 381.67 | 24.03  | 24.79  | 1.03 | 17.26 | -32.88 |
| Pirate perch    | 375.00  | 276.74 | 92.55  | 68.30  | 0.74 | 15.67 | -32.67 |
| Pirate perch    | 403.00  | 258.22 | 114.82 | 73.57  | 0.64 | 15.81 | -31.88 |
| Redfin pickerel | 290.00  | 88.27  | 64.03  | 19.49  | 0.30 | 15.63 | -29.39 |
| Redfin pickerel | 597.00  | 482.79 | 147.45 | 119.24 | 0.81 | 16.06 | -30.37 |
| Redfin pickerel | 876.00  | /      | 209.48 | /      | /    | /     | /      |
| Redfin pickerel | 563.00  | /      | 130.96 | /      | /    | /     | /      |
| Redfin pickerel | 263.00  | 171.87 | 63.20  | 41.30  | 0.65 | 17.40 | -29.02 |
| Spotted sunfish | 605.00  | 297.19 | 166.70 | 81.89  | 0.49 | 15.36 | -31.33 |
| Spotted sunfish | 277.00  | 104.11 | 78.29  | 29.42  | 0.38 | 17.36 | -29.91 |
| Spotted sunfish | 440.00  | 336.80 | 123.50 | 94.53  | 0.77 | 11.50 | -27.96 |
| Spotted sunfish | 573.00  | 274.12 | 148.93 | 71.25  | 0.48 | 9.36  | -29.06 |
| Spotted sunfish | 826.00  | 635.33 | 240.75 | 185.18 | 0.77 | 15.56 | -28.75 |
| Spotted sunfish | 386.00  | 209.21 | 106.13 | 57.52  | 0.54 | 14.88 | -31.02 |
| Spotted sunfish | 506.00  | 291.93 | 147.09 | 84.86  | 0.58 | 15.74 | -30.39 |
| Spotted sunfish | 773.00  | 621.62 | 215.95 | 173.66 | 0.80 | 16.08 | -29.63 |
| Spotted sunfish | 360.00  | 324.59 | 101.64 | 91.64  | 0.90 | 15.80 | -28.46 |
| Spotted sunfish | 668.00  | 231.53 | 178.25 | 61.78  | 0.35 | 15.89 | -30.14 |
| Spotted sunfish | 518.00  | /      | 155.38 | /      | /    | /     | /      |
| Yellow bullhead | 640.00  | 297.59 | /      | /      | 0.46 | 14.71 | -31.53 |
| Yellow bullhead | 1120.00 | 518.90 | 251.55 | 116.54 | 0.46 | 15.15 | -28.14 |
| Yellow bullhead | 327.00  | 140.59 | 79.69  | 34.26  | 0.43 | 14.50 | -32.03 |

|                 |        |        |       |       |      |       |        |
|-----------------|--------|--------|-------|-------|------|-------|--------|
| Yellow bullhead | 369.00 | 171.56 | 94.99 | 44.16 | 0.46 | 14.86 | -34.56 |
|-----------------|--------|--------|-------|-------|------|-------|--------|

Note: / indicates the concentration was not measured due to an inadequate amount of samples
